# Supplementary material
Source: Springer Nature journal article supplement (http://www.springermedizin.de/resource/supplementary/12968_2007_7_MOESM2_ESM.pdf/9577910)

% Prevalence of CMR AE

$p < 0.0001$

50  
40  
30  
20  
10  
0

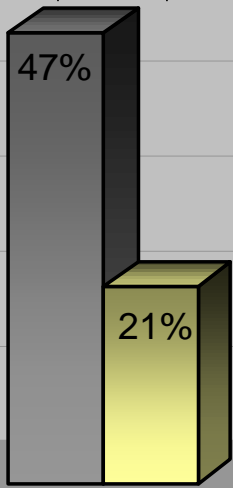

$p = \text{NS}$

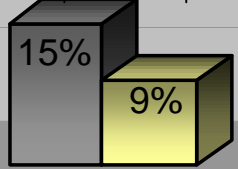

LAE

RAE

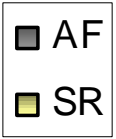

Supplement: MOESM2 [file 9577910]
